# Supplementary material
Source: PubMed Central journal article supplement (PMC5815072)
Supplement: jama-317-2493-s002.pdf [file jama-317-2493-s002.pdf]

## Supplementary Online Content

Liu Z, Liu Y, Xu H, et al. Effect of electroacupuncture on urinary leakage among women with stress urinary incontinence: a randomized clinical trial. *JAMA*. doi:10.1001/jama.2017.7220

**eAppendix 1.** Procedure for 1-hour Pad Test According to International Continence

Society Instructions

**eAppendix 2.** Multiple Imputation

**eTable 1.** Missing Data Patterns

**eAppendix 3.** Details for Results of Primary Analysis

**eTable 2.** Different Analysis Model Accounting for Center Effects

**eTable 3.** Multiple Imputation Under Departures From the Missing at Random

Assumption

**eTable 4.** Estimated Values with Age Adjustment for Change in Amount of Urine

Leakage Measured by the 1-Hour Pad Test

**eTable 5.** Estimated Values With Using Mixed-Effect Model With Repeated Measures

**eTable 6.** Adverse Events Unrelated to Treatment

**eTable 7.** Participant-Blinding Assessment Results

**eFigure.** A Forest Plot of Subgroup Analysis per Stress Urinary Incontinence Severity at

Baseline

**eReferences.**

This supplementary material has been provided by the authors to give readers additional information about their work.

23 **eAppendix 1. Procedure for 1-hour Pad Test According to International Continence**  
24 **Society Instructions<sup>1</sup>**

25 Participants were instructed to void 2 hours before the pad test. On arrival, they received a  
26 pre-weighed pad and were asked to sit and drink 500 ml sodium-free water in 15 minutes. Next, they  
27 were instructed to walk for 30 minutes, including going up and down 24 stairs. On returning to the  
28 clinic, the participants were instructed to perform several activities, including standing and sitting 10  
29 times, coughing vigorously 10 times, running for 1 minute, picking up a coin from the floor 5 times,  
30 and putting their hands under water for 1 minute. After the activities were completed, the pad was  
31 reweighed to measure the amount of urinary leakage.

32

33 **eAppendix 2. Multiple Imputation**

34 For the amount of urine leakage measured by the 1-hour pad test (primary outcome), we had 18 cases  
35 with missing data (see eTable1). The “Missing Data Patterns” table lists distinct missing data patterns  
36 with corresponding frequencies in each group . Here, a “Pattern” means an unique missing pattern  
37 from the data set; values of “v” and “x” indicate that the variable is observed or missing, respectively,  
38 in the corresponding pattern. The table confirms a monotone missing pattern for these three time  
39 points. We assumed the data were missing at random missing at random, and regression-based  
40 multiple imputation with baseline the amount of urine leakage measured by the 1-hour pad test as  
41 covariate was used (SAS PROC MI).<sup>2</sup>

42

43

44 **eTable 1.** Missing Data Patterns

| Pattern | Baseline | Week 2 | Week 6 | Electroacupuncture | Sham<br>electroacupuncture | Total (%) |
|---------|----------|--------|--------|--------------------|----------------------------|-----------|
| 1       | √        | √      | √      | 246                | 240                        | 248(96.4) |
| 2       | √        | √      | ×      | 0                  | 6                          | 6(1.2)    |
| 3       | √        | ×      | ×      | 6                  | 6                          | 12(2.4)   |

45 √ = complete data. × = incomplete data.

46

47

48 **Code:**

49 • `proc mi data=ds1tran nimpute=200 seed=19850901 out=test_reg;`

50 `var group col1 col2 col3;`

51 `class group;`

52 `monotone reg(col2 / details);`

53 `monotone reg(col3 / details);`

54 `run;`

55

56

57

58

59 **eAppendix 3. Details for Results of Primary Analysis**

60

61 Four sensitivity analyses (1 preplanned and three post hoc) were conducted for the primary outcome.  
62 The preplanned used control-based pattern model to evaluate sensitivity to missing data departure  
63 from the missing at random assumption. Three post hoc sensitivity analyses evaluated whether  
64 baseline imbalance in age, clinical site and a mixed-effect model with repeated measures could have  
65 diluted the estimates of treatment effect.

66

67 **1.1 Sensitivity Analysis for Accounting for Center Effects Using Three Methods**

68 In our multicenter trials, randomization is carried out using permuted blocks stratified by center. To  
69 account for center effects,<sup>3</sup> three methods were used to adjust for center effects in the analysis. 1)  
70 *without center effects*: ANOVA with change from baseline as response; 2) *fixed center effects*: ANCOVA  
71 with change from baseline as response variable, baseline the amount of urine leakage measured by  
72 the 1-hour pad test as a covariate, and treatment, site (dummy variable) and interaction between site  
73 and treatment as fixed effect; 3) *random center effects*: Mixed model with change from baseline as  
74 response variable, baseline the amount of urine leakage measured by the 1-hour pad test as a  
75 covariate, treatment as a fixed effect, site (dummy variable) and interaction between site and  
76 treatment as random effects. The results of unadjusted and adjusted for center effects showed  
77 stratified factor did not affect the treatment effects (eTable 2).

78

79

80 **eTable 2. Different Analysis Model Accounting for Center Effects**

| Variables                                                                                                   | Electroacupuncture<br>(n=252) | Sham<br>electroacupuncture<br>(n=252) | Difference<br>(95%CI) | p<br>value |
|-------------------------------------------------------------------------------------------------------------|-------------------------------|---------------------------------------|-----------------------|------------|
| <b>Change from baseline in amount of urine leakage measured by the 1-hour pad test, LS mean (95% CI), g</b> |                               |                                       |                       |            |
| Week 2 <sup>a</sup>                                                                                         |                               |                                       |                       |            |
| ANOVA                                                                                                       | -5.70 (-7.43 to -3.98)        | -2.17 (-3.89 to -0.45)                | 3.53 (1.10 to 5.97)   | <.001      |
| ANCOVA                                                                                                      | -5.81 (-7.22 to -4.40)        | -2.07 (-3.47 to -0.67)                | 3.74 (1.75 to 5.72)   | <.001      |
| Mixed model                                                                                                 | -5.80 (-8.06 to -3.55)        | -2.07 (-4.33 to 0.19)                 | 3.73 (1.71 to 5.76)   | <.001      |
| Week 6 <sup>b</sup>                                                                                         |                               |                                       |                       |            |
| ANOVA                                                                                                       | -9.80 (-11.65 to -7.96)       | -2.69 (-4.54 to -0.84)                | 7.12 (4.50 to 9.73)   | <.001      |
| ANCOVA                                                                                                      | -9.93 (-11.32 to -8.54)       | -2.56 (-3.96 to -1.17)                | 7.37 (5.40 to 9.33)   | <.001      |
| Mixed model                                                                                                 | -9.93 (-12.52 to -7.33)       | -2.57 (-5.16 to 0.03)                 | 7.36 (4.76 to 9.96)   | <.001      |

81 Abbreviations: CI, confidence interval; ANOVA, analysis of variance; ANCOVA, analysis of covariance; LS, least squares.

82 <sup>a</sup>The number of participants with imputed data was 6 (2.4%) in the electroacupuncture group, and 6 (2.4%) in the sham  
83 electroacupuncture group at 2-week.

84 <sup>b</sup>The number of participants with imputed data was 6 (2.4%) in the electroacupuncture group, and 12 (4.8%) in the sham  
85 electroacupuncture group at 6-week.

86

87 **1.2 Sensitivity analysis for departure from the assumption of missing at random with control-based**  
88 **pattern model**

89 The sensitivity analysis with a control-based pattern imputation model,<sup>4</sup> assessed whether the change  
90 from baseline in the amount of urine leakage measured by the 1-hour pad test at week 6 was robust  
91 to departure from missing at random missing at random. More specifically, an imputation model for  
92 the missing observations in the electroacupuncture group was constructed from the observed data in  
93 the sham electroacupuncture group rather than the electroacupuncture group. Parallel to the primary  
94 analysis based on missing at random missing at random, we were used a similar method with such an  
95 imputed data set to show the robustness of the final results. SAS PROC MI with the missing not at  
96 random statement was used. The results were robust to departure from missing at random missing at  
97 random(Table 2 and eTable 3).

98

99 **Code:**

```
100 proc mi data=ds1tran seed=19850901 nimpute=200 out=test_MNAR;
101     class group;
102     monotone reg;
103     mnar model( col2 /modelobs=(group='B'));
104     mnar model( col3 /modelobs=(group='B'));
105     var col1 col2 col3;
106 run;
107
108
```

109 **eTable 3.** Multiple Imputation Under Departures From the Missing at Random  
 110 Assumption for the Change of Amount of Urine Leakage Measured by the 1-Hour Pad  
 111 Test

|                                                                                                                   | Electroacupuncture<br>(n=252) | Sham<br>electroacupuncture<br>(n=252) | Difference<br>(95% CI) | <i>p</i> value |
|-------------------------------------------------------------------------------------------------------------------|-------------------------------|---------------------------------------|------------------------|----------------|
| Change from baseline in amount of urine leakage measured by the 1-hour pad test, LS mean (95% CI), g <sup>a</sup> |                               |                                       |                        |                |
| Week 2                                                                                                            | -5.64 (-7.87 to -3.42)        | -2.08 (-4.30 to 0.14)                 | 3.56 (1.54 to 5.58)    | <.001          |
| Week 6                                                                                                            | -9.66 (-12.20 to -7.12)       | -2.60 (-5.1 to -0.05)                 | 7.06 (4.48 to 9.64)    | <.001          |

112 Abbreviations: CI, confidence interval ; LS, least squares.

113 <sup>a</sup>Mixed model were used on the intention-to-treat population with control-based pattern imputation under the missing not at  
 114 random assumption for 18 participants (6 in the electroacupuncture group and 12 in the sham electroacupuncture group).

115

116 **1.3 Sensitivity Analysis for Adjustment of Baseline Imbalance in Age**

117 The baseline age was imbalanced from table 1 between groups electroacupuncture and sham  
 118 electroacupuncture (54.5 vs. 56.2, *P*=0.02). We believe that our randomization process worked  
 119 correctly. However, because baseline age is an important prognostic factor, to assess the robustness of  
 120 the primary analysis, a sensitivity analysis including the age factor as a covariate was performed. The  
 121 results of unadjusted and adjusted for age showed baseline imbalance in age did not affect the  
 122 treatment effects (Table 2 and eTable 4).

123

124

125 **eTable 4.** Estimated Values With Age Adjustment for Change in Amount of Urine  
 126 Leakage Measured by the 1-Hour Pad Test<sup>a</sup>

|                                                                                                             | <b>Electroacupuncture<br/>(n=252)</b> | <b>Sham<br/>electroacupuncture<br/>(n=252)</b> | <b>Difference (95% CI)</b> | <b>P value</b> |
|-------------------------------------------------------------------------------------------------------------|---------------------------------------|------------------------------------------------|----------------------------|----------------|
| <b>Change from baseline in amount of urine leakage measured by the 1-hour pad test, LS mean (95% CI), g</b> |                                       |                                                |                            |                |
| Week 2                                                                                                      | -5.78 (-8.04 to -3.53)                | -2.09 (-4.35 to 0.16)                          | 3.69 (1.66 to 5.73)        | <.001          |
| Week 6                                                                                                      | -9.97(-12.57 to -7.37)                | -2.53 (-5.13 to 0.08)                          | 7.44 (4.85 to 10.03)       | <.001          |

127 Abbreviations: CI, confidence interval; LS, least squares.

128 <sup>a</sup>The number of participants with imputed data was 6 (2.4%) in the electroacupuncture group, and 12 (4.8%) in the sham  
 129 electroacupuncture group.

130

131 **1.4 Sensitivity Analysis Using Mixed-Effect Model with Repeated Measures Method**

132

133 A sensitivity analysis also was performed using a mixed-effect model with repeated measures  
 134 approach. The model included change from baseline to 6-week as response variables, fixed-effects  
 135 factors for treatment, visit, treatment × visit interaction, and the amount of urine leakage measured  
 136 by the 1-hour pad test baseline value, random-effects factors for participant, site, and site × treatment  
 137 interaction. The model did not impute missing data points. An unstructured correlation matrix was  
 138 used to model the within participant errors. Parameters were estimated using the maximum  
 139 likelihood. The results from both week 2 and week 6 were robust to use the mixed-effect model with  
 140 repeated measures method (Table 2 and eTable 5).

141

142 **Code:**

```
143 proc mixed data=test_reg2 METHOD=ML;
144     class group(ref="A") center visit subjid ;
145     model col1=baseline group|visit/solution;
146     repeated /type=un sub=subjid;
147     random center center*group subjid;
148     lsmeans group*visit /diff cl;
149     ods output DIFFS=lsmdiffs lsmeans=lsmeans_ds(drop=effect) SOLUTIONF=parms;
150 run;
151 quit;
```

152

153

154



155

**eTable 5.** Estimated Values Using Mixed-Effect Model With Repeated Measures

|                                                                                                             | <b>Electroacupuncture</b> | <b>Sham<br/>electroacupuncture</b> | <b>Difference (95% CI)</b> | <b>p<br/>value</b> |
|-------------------------------------------------------------------------------------------------------------|---------------------------|------------------------------------|----------------------------|--------------------|
| <b>Change from baseline in amount of urine leakage measured by the 1-hour pad test, LS mean (95% CI), g</b> |                           |                                    |                            |                    |
| Week 2                                                                                                      | -5.81 (-8.22 to -3.41)    | -2.04 (-4.45 to 0.37)              | 3.77 (1.75 to 5.80)        | <.001              |
| Week 6                                                                                                      | -9.88(-12.29 to -7.47)    | -2.60 (-5.01 to -0.19)             | 7.28 (5.25 to 9.31)        | <.001              |

156

Abbreviations: CI, confidence interval; LS, least squares.

157

158

159

160

161 **eTable 6. Adverse Events Unrelated to Treatment**

| Adverse events <sup>a</sup> | Electroacupuncture<br>(n=247) <sup>b</sup> | Sham electroacupuncture<br>(n=249) <sup>b</sup> |
|-----------------------------|--------------------------------------------|-------------------------------------------------|
|                             | Participant, No. (%)                       | Participant, No. (%)                            |
| Total                       | 71 (28.74)                                 | 67 (26.91)                                      |
| Common cold                 | 59 (23.89)                                 | 52 (20.88)                                      |
| Chronic bronchitis          | 4 (1.62)                                   | 3 (1.20)                                        |
| Cough                       | 1 (0.40)                                   | 4 (1.61)                                        |
| Pharyngitis                 | 1 (0.40)                                   | 4 (1.61)                                        |
| Climacteric syndrome        | 1 (0.40)                                   | 3 (1.20)                                        |
| Rhinitis                    | 2 (0.81)                                   | 0 (0.00)                                        |
| Acute Bronchitis            | 1 (0.40)                                   | 0 (0.00)                                        |
| Cervical Spondylosis        | 0 (0.00)                                   | 1 (0.40)                                        |
| Fever                       | 0 (0.00)                                   | 1 (0.40)                                        |
| Knee Osteoarthritis         | 1 (0.40)                                   | 0 (0.00)                                        |
| Lumbar surgery              | 0 (0.00)                                   | 1 (0.40)                                        |
| Pneumonia                   | 1 (0.40)                                   | 0 (0.00)                                        |
| Uterine Fibroids            | 1 (0.40)                                   | 0 (0.00)                                        |

162 <sup>a</sup> Adverse events were analyzed in all participants who received treatment and counted by type rather than frequency in the  
163 same participant. Adverse events with different types occurring in one participant were defined as independent adverse events;  
164 an adverse event with multiple occurrences in one participant was defined as one adverse event.

165 <sup>b</sup> 5 participants in the electroacupuncture group and 3 in the sham electroacupuncture group did not receive treatment.

166

167

168

169 **eTable 7. Participant-Blinding Assessment Results**

|                        | <b>Treatment guess<br/>No. (%)</b> | <b>Electro-<br/>acupuncture<br/>(n=42)</b> | <b>Sham<br/>electroacupuncture<br/>(n=42)</b> | <b>Kappa<br/>Coefficient<br/>(95%CI)</b> | <b>p value<sup>c</sup></b> |
|------------------------|------------------------------------|--------------------------------------------|-----------------------------------------------|------------------------------------------|----------------------------|
| Week<br>3 <sup>a</sup> | 'Electroacupuncture'               | 31 (75.6)                                  | 29 (69.0)                                     | .07 (-0.13 to<br>0.26)                   | .63                        |
|                        | 'Sham Electroacupuncture'          | 10 (24.4)                                  | 13 (31.0)                                     |                                          |                            |
| Week<br>6 <sup>b</sup> | 'Electroacupuncture'               | 32 (78.0)                                  | 25 (64.1)                                     | .14 (-0.06 to<br>0.34)                   | .22                        |
|                        | 'Sham Electroacupuncture'          | 9 (22.0)                                   | 14 (35.9)                                     |                                          |                            |

170 <sup>a</sup> One participant in the electroacupuncture group was not recorded at week 3.

171 <sup>b</sup> One participant in the electroacupuncture group and 3 participants in the sham electroacupuncture group were not recorded  
172 at week 6.

173 <sup>c</sup> P was calculated from a kappa analysis.

**eFigure.** Forest Plot of Subgroup Analysis per Stress Urinary incontinence Severity at Baseline by Mixed Effects Model

**w**

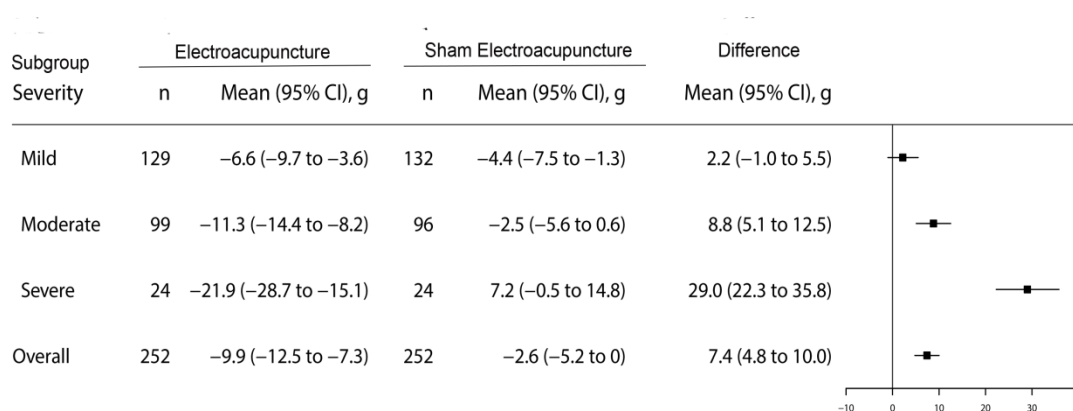

Abbreviations: CI, confidence intervals. The estimated mean values were change from baseline to week 6. A post-hoc subgroup analysis for stress urinary incontinence severity based on the baseline amount of urine leakage measured by the 1-hour pad test was conducted by adding an interaction term of the stress urinary incontinence severity rated  $\times$  treatment into the primary analysis. The mixed effects model showed that the interaction between severity of incontinence and treatment was statistically significant ( $P < .001$ ). Stress urinary incontinence severity was based on baseline amount of urine leakage measured by the 1-hour pad test as follows: 1.1-9.9 g, mild; 10-49.9 g, moderate;  $\geq 50$  g, severe.

## eReferences

1. Abrams P, Blaivas JG, Stanton SL, Andersen JT. The standardisation of terminology of lower urinary tract function. The International Continence Society Committee on Standardisation of Terminology. *Scand J Urol Nephrol Suppl.* 1988;114:5-19.
2. Yuan Y. Multiple imputation using SAS software. *J Stat Softw.* 2011.
3. Kahan BC, Morris TP. Analysis of multicentre trials with continuous outcomes: when and how should we account for centre effects. *Stat Med.* 2013;32(7):1136-1149.
4. Ratitch B, O'Kelly M. Implementation of pattern-mixture models using standard SAS/STAT procedures. 2011. <http://pharmasug.org/proceedings/2011/SP/PharmaSUG-2011-SP04.pdf>. Accessed July 25,2012.
